# Supplementary material
Source: MDPI journal article supplement (https://www.mdpi.com/2073-4395/14/5/1079)
Supplement: s1 [file s1 › agronomy-3003658-supplementary.pdf]

## *Supplementary Material*

**Supplementary Table S1.** Effects of salt stress on plant height and survival rate of different varieties of switchgrass at five-leaf stage

| Varieties    | Plant height in normal (cm) | Plant height under stress (cm) | Decreasing rate of plant height (%) | Survival rate under salt stress (%) |
|--------------|-----------------------------|--------------------------------|-------------------------------------|-------------------------------------|
| BoMaster     | 20.5 ± 0.36                 | 19.7 ± 0.07                    | 3.90                                | 86.6 ± 1.56                         |
| Trailblazer  | 20.0 ± 0.27                 | 19.2 ± 0.18                    | 4.97                                | 63.3 ± 3.11                         |
| Forestburg   | 22.2 ± 0.98                 | 21.1 ± 0.23                    | 4.91                                | 60.0 ± 2.74                         |
| Carthage     | 18.7 ± 0.27                 | 17.8 ± 0.19                    | 4.81                                | 60.0 ± 2.69                         |
| Alamo        | 19.5 ± 0.73                 | 18.3 ± 0.53                    | 6.15                                | 56.7 ± 1.56                         |
| Blackwelle   | 20.5 ± 0.19                 | 18.5 ± 0.32                    | 7.86                                | 56.7 ± 1.56                         |
| Cave-in-Rock | 19.2 ± 1.01                 | 17.6 ± 0.27                    | 8.33                                | 53.3 ± 1.56                         |
| Shawne       | 20.9 ± 0.58                 | 19.2 ± 0.27                    | 8.13                                | 53.3 ± 2.74                         |
| Dacotah      | 19.6 ± 0.45                 | 17.9 ± 0.21                    | 8.67                                | 36.6 ± 1.56                         |
| NE 28        | 20.6 ± 0.36                 | 18.6 ± 0.29                    | 9.71                                | 33.3 ± 2.73                         |
| Pathfinder   | 20.3 ± 0.91                 | 18.8 ± 0.12                    | 10.34                               | 30.0 ± 1.56                         |

*Note:* In a pot experiment, switchgrass was continuously watered with 250 mmol/L sodium chloride solution for three days, and the growth performance above was measured on the 7th day.

**Supplementary Table S2.** Effect of salt stress and humic acid on switchgrass leaf length and leaf width

| Treatments               | Leaf length (cm) | Leaf width (cm) |
|--------------------------|------------------|-----------------|
| Control                  | 27.13 ± 0.92 a   | 0.98 ± 0.04 a   |
| Salt stress              | 22.50 ± 0.73 b   | 0.77 ± 0.03 b   |
| Salt stress + Humic acid | 26.73 ± 1.74 a   | 0.97 ± 0.05 a   |

*Note:* Letters “a” and “b” showed a significant difference (p<0.05) among treatments.
